# Supplementary material for: Comprehensive evaluation of methods for identifying tissues or cell types of origin of the plasma cell-free transcriptome
Source: PeerJ journal article supplement (doi:10.7717/peerj.19241), 2025-04-17
Supplement: Supplemental_File_S1.zip [file Supplemental_File_S1.zip]

## Sheet: Sheet1
origin	Chen et al.	Roskams-Hieter et al.	Sun et al.	Tao et al.
aDC	0.0313544	0.0315979	0.0610158	0.0130758
Adipocytes	2.56565e-18	2.09388e-19	0.00191729	5.52499e-05
Astrocytes	3.10621e-17	3.36435e-18	1.36272e-17	0.00305936
B.cells	0.0814973	0.187554	0.168266	0.0272518
Basophils	0.123753	0.0280544	0.101045	0.122467
CD4..memory.T.cells	0.653887	4.22506e-19	0.0397871	0.000557103
CD4..naive.T.cells	0.0619788	0.020517	0.0141192	2.74321e-05
CD4..T.cells	0.0164593	2.77293e-18	0.000188602	0.000197191
CD4..Tcm	4.56677e-18	0.000656491	0.00113254	0.00143117
CD4..Tem	1.52209e-17	0.00361263	0.0032625	0.00637111
CD8..naive.T.cells	0.00483137	0.0032467	0.0302711	0.00685306
CD8..T.cells	0.0065046	0.0113157	0.0260944	0.0101177
CD8..Tcm	0.0142975	0.00313056	0.0110341	0.0183643
CD8..Tem	0.00194848	0.0105607	1.28917e-17	0.000518292
cDC	0.0393724	0.00734184	0.0417184	0.043319
Chondrocytes	8.16054e-18	2.58252e-18	0.000610133	6.15538e-18
Class.switched.memory.B.cells	0.0244555	0.016607	0.0290239	0.0118106
CLP	0.520718	0.0171495	0.179977	0.140223
CMP	0.000525268	0.00845193	0.0212137	0.00531662
DC	0.000287033	0.000547614	0.0017055	0.00460815
Endothelial.cells	0.0473953	0.00890686	0.0355022	0.0433467
Eosinophils	0.000328921	0.00257016	0.011941	0.00655727
Epithelial.cells	0.0014505	0.00257269	0.0156133	0.000904413
Erythrocytes	0.0205714	0.00397169	0.0217018	0.00167703
Fibroblasts	3.25734e-18	0.00832184	0.0128277	9.0702e-05
GMP	0.00212689	0.0149737	0.0199168	0.0155878
Hepatocytes	4.16653e-18	0.000254786	0.00597179	0.00117191
HSC	0.443319	0.088269	0.218851	0.18473
iDC	0.0262902	0.0375626	0.0735221	0.0689535
Keratinocytes	2.76566e-05	1.40806e-19	0.000268139	0.000189424
ly.Endothelial.cells	0.026005	0.00123603	0.0195488	0.0147286
Macrophages	0.00114195	0.000271605	0.00812481	3.81887e-05
Macrophages.M1	0.00010488	0.000670054	0.00277265	0.00160577
Macrophages.M2	0.00441442	0.00114757	0.0183156	0.00360533
Mast.cells	0.101369	0.00137489	0.0387136	0.0255308
Megakaryocytes	0.0894905	0.00101287	0.0455374	0.0141133
Melanocytes	0.000733917	0.00151381	0.0024024	0.000294937
Memory.B.cells	0.028205	0.0797417	0.007106	0.00892614
MEP	0.000188431	0.0134603	0.0317338	0.00676912
Mesangial.cells	0.000277345	1.17679e-18	0.0102989	0.00393052
Monocytes	0.00479298	0.0042625	0.012437	0.00411914
MPP	2.05243e-17	4.71527e-18	1.05276e-05	9.12599e-18
MSC	0.0188257	0.074704	0.0363701	0.0263348
mv.Endothelial.cells	0.0225176	0.005815	0.029359	0.0223579
Myocytes	0.00448785	0.0023441	0.0115039	0.00265901
naive.B.cells	0.0102435	0.0672057	0.0150508	0.00916117
Neurons	0.00127419	0.000199474	0.00261234	0.00124446
Neutrophils	0.0124514	0.00303373	0.019013	0.00545339
NK.cells	0.00236088	7.67837e-18	1.67928e-17	0.000150272
NKT	0.0604401	0.0397219	0.23188	0.0502195
Osteoblast	5.08367e-05	0.0475792	0.0750518	0.00206845
pDC	0.0819454	0.00385954	0.0204821	0.0411593
Pericytes	8.05164e-18	0.000482403	0.00669101	0.00634727
Plasma.cells	0.0401956	0.0437473	0.0700072	0.0918787
Platelets	0.212538	0.110074	0.069305	0.0332219
Preadipocytes	0.000998173	0.00589413	0.0591871	0.000250062
pro.B.cells	0.00579504	0.0140611	0.0011478	0.00315745
Sebocytes	7.97487e-05	7.13811e-20	0.000108864	7.14203e-05
Skeletal.muscle	5.70167e-18	5.3743e-05	0.00127797	0.00336096
Smooth.muscle	1.02159	0.176425	0.653865	0.611345
Tgd.cells	0.0119742	6.58739e-18	1.37524e-17	1.10964e-17
Th1.cells	0.0787686	0.0106543	0.131839	0.47414
Th2.cells	0.11227	0.0389028	0.0800286	0.00133144
Tregs	0.00473718	0.00463395	0.00202404	0.000265511
ImmuneScore	0.151462	0.14062	0.190989	0.056016
StromaScore	0.0236976	0.00861435	0.0251236	0.0217463
MicroenvironmentScore	0.17516	0.149235	0.216113	0.0777623
other_term	1.58191	0.806391	1.78283	0.831292
