# Supplementary material for: Comprehensive evaluation of methods for identifying tissues or cell types of origin of the plasma cell-free transcriptome
Source: PeerJ journal article supplement (doi:10.7717/peerj.19241), 2025-04-17
Supplement: Supplemental_Table_S1.xlsx [file Supplemental_Table_S1.xlsx]

## Sheet: tissue_merge_info
filename	TISSEUE	tissuename	aftermerge	sample_number	cor_the	genenumber_the	outlier_number			NOTE:We calculated the correlation of each sample with all other samples within the same tissue using Spearman's method, and then determined the correlation threshold (cor_the) for each tissue by subtracting five times the variance of these correlations from their mean value. Following the same criteria, we calculated the gene count threshold (genenumber_the) for each tissue.
gene_tpm_adrenal_gland.gct	Adrenal.Gland	Adrenal_gland	Adrenal_gland	258	0.911211	15063.7	0
gene_tpm_artery_aorta.gct	Artery...Aorta	Artery_Aorta	Artery	432	0.932855	15041.2	4
gene_tpm_artery_coronary.gct	Artery...Coronary	Artery_Coronary	Artery	240	0.898651	15090.4	0
gene_tpm_artery_tibial.gct	Artery...Tibial	Artery_Tibial	Artery	663	0.926017	14598.4	3
gene_tpm_bladder.gct	Bladder	Bladder	Bladder	21	0.874672	14964	0
gene_tpm_cervix_ectocervix.gct	Cervix...Ectocervix	Cervix_Ectocervix	Cervix__Fallopian_Tube__Uterus	9	0.726724	15026.9	0
gene_tpm_cervix_endocervix.gct	Cervix...Endocervix	Cervix_Endocervix	Cervix__Fallopian_Tube__Uterus	10	0.908456	15161.7	0
gene_tpm_fallopian_tube.gct	Fallopian.Tube	Fallopian_Tube	Cervix__Fallopian_Tube__Uterus	9	0.80585	15267.3	0
gene_tpm_ovary.gct	Ovary	Ovary	Ovary	180	0.906	15091.6	0
gene_tpm_prostate.gct	Prostate	Prostate	Prostate	245	0.877171	15658.3	0
gene_tpm_uterus.gct	Uterus	Uterus	Cervix__Fallopian_Tube__Uterus	142	0.925241	15069.5	0
gene_tpm_brain_cerebellar_hemisphere.gct	Brain...Cerebellar.Hemisphere	Brain_Cerebellar_Hemisphere	Brain_Cerebellar	215	0.932819	15375.4	1
gene_tpm_brain_cerebellum.gct	Brain...Cerebellum	Brain_Cerebellum	Brain_Cerebellar	241	0.950032	15617.6	0
gene_tpm_brain_amygdala.gct	Brain...Amygdala	Brain_Amygdala	Brain_other_region	152	0.871772	15181.2	1
gene_tpm_brain_anterior_cingulate_cortex_ba24.gct	Brain...Anterior.cingulate.cortex..BA24.	Brain_Anterior_cingulate_cortex_BA24	Brain_other_region	176	0.888534	15257.9	1
gene_tpm_brain_caudate_basal_ganglia.gct	Brain...Caudate..basal.ganglia.	Brain_Caudate_basal_ganglia_	Brain_other_region	246	0.904571	15348.9	0
gene_tpm_brain_cortex.gct	Brain...Cortex	Brain_Cortex	Brain_other_region	255	0.918695	15621.7	1
gene_tpm_brain_frontal_cortex_ba9.gct	Brain...Frontal.Cortex..BA9.	Brain_Frontal_Cortex_BA9	Brain_other_region	209	0.885851	15592.6	1
gene_tpm_brain_hippocampus.gct	Brain...Hippocampus	Brain_Hippocampus	Brain_other_region	197	0.889942	15116.4	1
gene_tpm_brain_hypothalamus.gct	Brain...Hypothalamus	Brain_Hypothalamus	Brain_other_region	202	0.878365	15462.3	1
gene_tpm_brain_nucleus_accumbens_basal ganglia.gct	Brain...Nucleus.accumbens..basal.ganglia.	Brain_Nucleus_accumbens_basal_ganglia	Brain_other_region	246	0.885389	15175.8	0
gene_tpm_brain_putamen_basal_ganglia.gct	Brain...Putamen..basal.ganglia.	Brain_Putamen_basal_ganglia_	Brain_other_region	205	0.915352	14994	0
gene_tpm_brain_spinal_cord_cervical_c-1).gct	Brain...Spinal.cord..cervical.c.1.	Brain_Spinal_cord_cervical_c_1	Brain_other_region	159	0.909751	15167.4	0
gene_tpm_brain_substantia_nigra.gct	Brain...Substantia.nigra	Brain_Substantia_nigra	Brain_other_region	139	0.902671	15183	1
gene_tpm_adipose_subcutaneous.gct	Adipose...Subcutaneous	Adipose_Subcutaneous	Adipose	663	0.926828	15071.7	2
gene_tpm_adipose_visceral_omentum.gct	Adipose...Visceral..Omentum.	Adipose_Visceral_Omentum	Adipose	541	0.91719	15310.1	1
gene_tpm_breast_mammary_tissue.gct	Breast...Mammary.Tissue	Breast_Mammary_Tissue	Breast_Mammary_Tissue	459	0.890324	15029.7	1
gene_tpm_colon_sigmoid.gct	Colon...Sigmoid	Colon_Sigmoid	Colon_Sigmoid	373	0.844519	15297.5	5
gene_tpm_esophagus_gastroesophageal_junction.gct	Esophagus...Gastroesophageal.Junction	Esophagus_Gastroesophageal_Junction	Esophagus_Gastroesophageal_Junction__Esophagus_Muscularis	375	0.92311	15160.7	2
gene_tpm_esophagus_mucosa.gct	Esophagus...Mucosa	Esophagus_Mucosa	Esophagus_Mucosa	555	0.91252	15267.4	1
gene_tpm_esophagus_muscularis.gct	Esophagus...Muscularis	Esophagus_Muscularis	Esophagus_Gastroesophageal_Junction__Esophagus_Muscularis	515	0.92511	15022.2	1
gene_tpm_vagina.gct	Vagina	Vagina	Vagina	156	0.842862	15327.4	0
gene_tpm_heart_atrial_appendage.gct	Heart...Atrial.Appendage	Heart_Atrial_Appendage	Heart	429	0.92554	15084.2	0
gene_tpm_heart_left_ventricle.gct	Heart...Left.Ventricle	Heart_Left_Ventricle	Heart	432	0.891977	14351.1	1
gene_tpm_kidney_cortex.gct	Kidney...Cortex	Kidney_Cortex	Kidney	85	0.896216	15451.2	0
gene_tpm_kidney_medulla.gct	Kidney...Medulla	Kidney_Medulla	Kidney	4	0.887861	16430.1	0
gene_tpm_liver.gct	Liver	Liver	Liver	226	0.91363	14811.7	1
gene_tpm_lung.gct	Lung	Lung	Lung	578	0.90196	15551.8	3
gene_tpm_minor_salivary_gland.gct	Minor.Salivary.Gland	minor_salivary_gland	minor_salivary_gland	162	0.849988	15659	0
gene_tpm_muscle_skeletal.gct	Muscle...Skeletal	Muscle_skeletal	Muscle_skeletal	803	0.930727	14178.6	4
gene_tpm_nerve_tibial.gct	Nerve...Tibial	Nerve_tibial	Nerve_tibial	619	0.941389	15411.5	1
gene_tpm_pancreas.gct	Pancreas	Pancreas	Pancreas	328	0.937544	14989.5	0
gene_tpm_pituitary.gct	Pituitary	Pituitary	Pituitary	283	0.863043	16034.6	1
gene_tpm_skin_not_sun_exposed_suprapubic.gct	Skin...Not.Sun.Exposed..Suprapubic.	Skin_Not_Sun_Exposed_Suprapubic	Skin	604	0.911355	15453.4	5
gene_tpm_skin_sun_exposed_lower_leg.gct	Skin...Sun.Exposed..Lower.leg.	Skin_Sun_Exposed_Lower_leg	Skin	701	0.908169	15546.6	8
gene_tpm_colon_transverse.gct	Colon...Transverse	Colon_Transverse	Colon_Transverse	406	0.839336	15557.5	0
gene_tpm_small_intestine_terminal_ileum.gct	Small.Intestine...Terminal.Ileum	Small_Intestine_Terminal_Ileum	Small_Intestine_Terminal_Ileum	187	0.813872	15774.1	0
gene_tpm_spleen.gct	Spleen	Spleen	Spleen	241	0.934405	15456.5	1
gene_tpm_stomach.gct	Stomach	Stomach	Stomach	359	0.824668	15352.2	0
gene_tpm_testis.gct	Testis	Testis	Testis	361	0.857995	17360.4	4
gene_tpm_thyroid.gct	Thyroid	Thyroid	Thyroid	653	0.919929	15476.9	4
gene_tpm_whole_blood.gct	Whole.Blood	Whole_blood	Whole_blood	755	0.894889	13161.1	1
