# Supplementary material for: Comprehensive evaluation of methods for identifying tissues or cell types of origin of the plasma cell-free transcriptome
Source: PeerJ journal article supplement (doi:10.7717/peerj.19241), 2025-04-17
Supplement: Supplemental_Table_S2.xlsx [file Supplemental_Table_S2.xlsx]

## Sheet: Sheet1
representative name	names of the merged cell types	include celltype
basophil	basophil	basophil
plasmablast	plasmablast	plasmablast
myeloid_progenitor	myeloid_progenitor	myeloid_progenitor
neutrophil	neutrophil	neutrophil
mast_cell	mast_cell	mast_cell
monocyte	monocyte	monocyte
plasma_cell	plasma_cell	plasma_cell
erythrocyte	erythrocyte__erythroid_progenitor	erythrocyte	erythroid_progenitor
mature_conventional_dendritic_cell	mature_conventional_dendritic_cell	mature_conventional_dendritic_cell
innate_lymphoid_cell	innate_lymphoid_cell	innate_lymphoid_cell
hematopoietic_stem_cell	hematopoietic_stem_cell	hematopoietic_stem_cell
t_cell	t_cell	t_cell
b_cell	b_cell	b_cell
nk_cell	nk_cell	nk_cell
platelet	platelet	platelet
goblet_cell	goblet_cell	goblet_cell
pericyte_cell	pericyte_cell	pericyte_cell
basal_cell	basal_cell	basal_cell
club_cell	club_cell__type_i_pneumocyte	club_cell	type_i_pneumocyte
schwann_cell	schwann_cell	schwann_cell
acinar_cell_of_salivary_gland	acinar_cell_of_salivary_gland__myoepithelial_cell	acinar_cell_of_salivary_gland	myoepithelial_cell
bladder_urothelial_cell	bladder_urothelial_cell	bladder_urothelial_cell
intestinal_enterocyte	intestinal_enterocyte	intestinal_enterocyte
fibroblast	fibroblast__mesenchymal_stem_cell	fibroblast	mesenchymal_stem_cell
duodenum_glandular_cell	duodenum_glandular_cell	duodenum_glandular_cell
pancreatic_alpha_cell	pancreatic_alpha_cell__pancreatic_beta_cell	pancreatic_alpha_cell	pancreatic_beta_cell
keratinocyte	keratinocyte	keratinocyte
ciliated_cell	ciliated_cell__lung_ciliated_cell	ciliated_cell	lung_ciliated_cell
pancreatic_acinar_cell	pancreatic_acinar_cell	pancreatic_acinar_cell
pancreatic_stellate_cell	pancreatic_stellate_cell	pancreatic_stellate_cell
intestinal_enteroendocrine_cell	intestinal_enteroendocrine_cell__paneth_cell_of_epithelium_of_small_intestine__transit_amplifying_cell_of_small_intestine	intestinal_enteroendocrine_cell	paneth_cell_of_epithelium_of_small_intestine	transit_amplifying_cell_of_small_intestine
respiratory_goblet_cell	respiratory_goblet_cell__respiratory_mucous_cell__serous_cell_of_epithelium_of_trachea	respiratory_goblet_cell	respiratory_mucous_cell	serous_cell_of_epithelium_of_trachea
ciliated_epithelial_cell	ciliated_epithelial_cell__epithelial_cell_of_uterus	ciliated_epithelial_cell	epithelial_cell_of_uterus
cardiac_muscle_cell	cardiac_muscle_cell	cardiac_muscle_cell
luminal_cell_of_prostate_epithelium	luminal_cell_of_prostate_epithelium	luminal_cell_of_prostate_epithelium
basal_cell_of_prostate_epithelium	basal_cell_of_prostate_epithelium	basal_cell_of_prostate_epithelium
thymocyte	thymocyte	thymocyte
endothelial_cell	endothelial_cell	endothelial_cell
mucus_secreting_cell	mucus_secreting_cell__secretory_cell__tracheal_goblet_cell	mucus_secreting_cell	secretory_cell	tracheal_goblet_cell
kidney_epithelial_cell	kidney_epithelial_cell	kidney_epithelial_cell
intrahepatic_cholangiocyte	intrahepatic_cholangiocyte	intrahepatic_cholangiocyte
duct_epithelial_cell	duct_epithelial_cell__serous_cell_of_epithelium_of_bronchus	duct_epithelial_cell	serous_cell_of_epithelium_of_bronchus
macrophage	macrophage	macrophage
type_ii_pneumocyte	type_ii_pneumocyte	type_ii_pneumocyte
tendon_cell	tendon_cell	tendon_cell
adventitial_cell	adventitial_cell	adventitial_cell
salivary_gland_cell	salivary_gland_cell	salivary_gland_cell
medullary_thymic_epithelial_cell	medullary_thymic_epithelial_cell	medullary_thymic_epithelial_cell
smooth_muscle_cell	smooth_muscle_cell	smooth_muscle_cell
cell_of_skeletal_muscle	cell_of_skeletal_muscle	cell_of_skeletal_muscle
intestinal_tuft_cell	intestinal_tuft_cell	intestinal_tuft_cell
stromal_cell	stromal_cell	stromal_cell
melanocyte	melanocyte	melanocyte
pulmonary_ionocyte	pulmonary_ionocyte	pulmonary_ionocyte
club_cell_of_prostate_epithelium	club_cell_of_prostate_epithelium__hillock_cell_of_prostate_epithelium__hillock_club_cell_of_prostate_epithelium	club_cell_of_prostate_epithelium	hillock_cell_of_prostate_epithelium	hillock_club_cell_of_prostate_epithelium
mesothelial_cell	mesothelial_cell	mesothelial_cell
pancreatic_ductal_cell	pancreatic_ductal_cell	pancreatic_ductal_cell
hepatocyte	hepatocyte	hepatocyte
ionocyte	ionocyte__luminal_epithelial_cell_of_mammary_gland	ionocyte	luminal_epithelial_cell_of_mammary_gland
immature_enterocyte	immature_enterocyte__intestinal_crypt_stem_cell__intestinal_crypt_stem_cell_of_small_intestine__transit_amplifying_cell_of_large_intestine	immature_enterocyte	intestinal_crypt_stem_cell	intestinal_crypt_stem_cell_of_small_intestine	transit_amplifying_cell_of_large_intestine
