# Supplementary material for: Comprehensive evaluation of methods for identifying tissues or cell types of origin of the plasma cell-free transcriptome
Source: PeerJ journal article supplement (doi:10.7717/peerj.19241), 2025-04-17
Supplement: Supplemental_Table_S3.xlsx [file Supplemental_Table_S3.xlsx]

## Sheet: Sheet1
	Sun et al.	Chen et al.	Roskams Hieter et al.
up DEG number	153	2801	2
up DEG number（liver specific）	28	58	0
down DEG number	726	1030	44
down DEG number（platelet specific）	7	5	0
NOTE: The 'up DEG number (liver specific)' refers to the count of up-regulated differentially expressed genes (DEGs) that overlap with liver-specific genes from the HPA. The 'down DEG number（platelet specific）' refers to the count of down-regulated differentially expressed genes (DEGs) that overlap with platelet specific genes from the HPA
